# Supplementary material for: The Role of Dimensionality in Understanding Granuloma Formation
Source: PubMed Central journal article supplement (PMC6599587; doi:10.3390/computation6040058), 2018-11-14
Supplement: NIHMS998495-supplement-Supplementary_file_1.pdf [file NIHMS998495-supplement-Supplementary_file_1.pdf]

# Supplementary Materials

## The Role of Dimensionality in Understanding Granuloma Formation

**Simeone Marino** <sup>1,2</sup>, **Caitlin Hult** <sup>1,3</sup>, **Paul Wolberg** <sup>1,3</sup>, **Jennifer J. Linderman** <sup>3</sup> and **Denise E. Kirschner** <sup>1,4,\*</sup>

<sup>1</sup> Department of Microbiology and Immunology, University of Michigan Medical School, Ann Arbor, MI 48109, USA; simeonem@umich.edu (S.M.); cshult@umich.edu (C.H.); pwolberg@umich.edu (P.W.)

<sup>2</sup> Statistics Online Computational Resource (SOCR), Department of Health Behavior and Biological Sciences, University of Michigan, Ann Arbor, MI 48109, USA

<sup>3</sup> Department of Chemical Engineering, University of Michigan, Ann Arbor, MI 48109, USA; linderma@umich.edu

<sup>4</sup> Department of Computational Medicine and Bioinformatics, University of Michigan, Ann Arbor, MI 48109, USA

\* Correspondence: kirschne@umich.edu

**Table S1.** List of all the parameters varied in the pilot uncertainty study, with the respective description and LHS range.

| <b>Parameter Name</b>                       | <b>Range</b>   | <b>Units</b>                                       | <b>Description</b>                                                           |
|---------------------------------------------|----------------|----------------------------------------------------|------------------------------------------------------------------------------|
| <i>Mtb/@growthExtMtbBound</i>               | [180,240]      | #bacteria                                          | Upper bound of number of extMtb used in growth function                      |
| <i>Mtb.Numbers/@growthRateIntMtb</i>        | [1.001, 1.006] | fraction of mtb/agent time step                    | Fractional growth rate of intracellular bacteria                             |
| <i>Mtb.Numbers/@growthRateExtMtb</i>        | [1.001, 1.003] | fraction of mtb/agent time step                    | Fractional growth rate of extracellular bacteria                             |
| <i>Mtb.Numbers/@deathRateExtMtbCaseated</i> | [1,2]          | 1/agent time step                                  | Upper bound on the number of extMtb used in growth function                  |
| <i>Core/@estBoundFactorTNF</i>              | [0.4,0.5]      | fraction of TNFR1 receptors that are TNF bound     | Adjustment for coarse grained internalized fraction estimate                 |
| <i>Core/@estBoundFactorIL10</i>             | [0.4,0.6]      | ?fraction of IL10R receptors that are IL10 bound   | Adjustment for coarse grained internalized fraction estimate                 |
| <i>Core/@estConsRateTNF</i>                 | [5e-4,9e-4]    | 1/seconds                                          | Scaling factor for coarse grained TNF dynamics                               |
| <i>Core/@estConsRateIL10</i>                | [2e-4,6e-4]    | 1/seconds                                          | Scaling factor for coarse grained IL10 dynamics                              |
| <i>Core/@estIntPartitionTNF</i>             | [9,13]         | ?fraction of TNFR1 receptors that are internalized | Scaling factor for coarse grained internalization of boundTNFR1              |
| <i>Core/@nrKillingsCaseation</i>            | [7,13]         | #cells                                             | Number of killings for a compartment to become caseated                      |
| <i>Core/@caseationHealingTime</i>           | [1700,2600]    | #agent time steps                                  | Time it takes for a caseated compartment to heal                             |
| <i>Core/@sourceDensity</i>                  | [0.002,0.05]   | fraction of total grid compartments                | Density of vascular sources on the grid                                      |
| <i>Core/@diffusivityTNF</i>                 | [4e-08,6e-08]  | cm <sup>2</sup> /second                            | TNF diffusivity                                                              |
| <i>Core/@diffusivityChemokines</i>          | [4e-08,6e-08]  | cm <sup>2</sup> /second                            | Chemokine diffusivity                                                        |
| <i>Core/@diffusivityIL10</i>                | [4e-08,6e-08]  | cm <sup>2</sup> /second                            | IL10 diffusivity                                                             |
| <i>Core/@ChemokineDeg</i>                   | [0.0005,0.005] | 1/seconds                                          | Chemokine degradation rate constant                                          |
| <i>Core/@kDeg</i>                           | [0.0005,0.005] | 1/seconds                                          | TNF degradation rate constant                                                |
| <i>Core/@Ikdeg</i>                          | [0.0003,0.003] | 1/seconds                                          | Degradation rate constant for ODE IL10                                       |
| <i>Core/@IC50ChemokineIL10</i>              | [1,10]         | #molecules/milli-liter                             | IC50 of IL10 inhibition of chemokine secretion - All chemokines are the same |
| <i>Core/@thresholdApoptosisTNF</i>          | [1000,5000]    | #internalized TNF-bound TNFR1                      | TNF threshold for TNF-induced apoptosis                                      |
| <i>Core/@kApoptosis</i>                     | [1e-07,2e-6]   | 1/seconds                                          | Rate of TNF-induced apoptosis                                                |
| <i>Core/@saturationApoptosisTNF</i>         | [5000,9000]    | #molecules                                         | Signal saturation of number of int-bound TNFR1 Molecules                     |

---

|                                     |               |                                                                                              |                                                                                                    |
|-------------------------------------|---------------|----------------------------------------------------------------------------------------------|----------------------------------------------------------------------------------------------------|
| <i>Core/@minChemotaxis</i>          | [1,50]        | #molecules                                                                                   | Chemotaxis sensitivity range (lower bound)                                                         |
| <i>Core/@maxChemotaxis</i>          | [100,1000]    | #molecules                                                                                   | Chemotaxis sensitivity range (upper bound)                                                         |
| <i>Core/@MaxIL10Inhibition</i>      | [0.05,0.3]    | log10(nanograms/milli-liter)                                                                 | Coarse grained TNF/IL10 dose dependence parameter beta                                             |
| <i>Core.Mac/@initDensity</i>        | [0.005,0.03]  | fraction of total grid compartments                                                          | Initial density of resting macrophages on the grid                                                 |
| <i>Core.Mac/@movementRest</i>       | [1,10]        | #agent time steps                                                                            | Time required for a resting macrophage to move one micro-compartment                               |
| <i>Core.Mac/@movementAct</i>        | [10,50]       | #agent time steps                                                                            | Time required for an active macrophage to move one micro-compartment                               |
| <i>Core.Mac/@movementInf</i>        | [100,200]     | #agent time steps                                                                            | Time required for an infected macrophage to move one micro-compartment                             |
| <i>Core.Mac/@dTnf</i>               | [1.3,1.7]     | #molecules/second                                                                            | Secretion rate of TNF by Mac                                                                       |
| <i>Core.Mac/@dCCL2</i>              | [4,8]         | #molecules/second                                                                            | Secretion rate of CCL2 by Mac                                                                      |
| <i>Core.Mac/@dCCL5</i>              | [4,8]         | #molecules/second                                                                            | Secretion rate of CCL5 by Mac                                                                      |
| <i>Core.Mac/@dCXCL9</i>             | [10,14]       | #molecules/second                                                                            | Secretion rate of CXCL9 by Mac                                                                     |
| <i>Core.Mac/@dIL10Act</i>           | [0.2,0.4]     | #molecules/second                                                                            | Secretion rate of IL10 by Mac Act                                                                  |
| <i>Core.Mac/@dIL10Inf</i>           | [0.01,0.03]   | #molecules/second                                                                            | Secretion rate of IL10 by Mac Inf                                                                  |
| <i>Core.Mac/@halfSatIL10</i>        | [170,210]     | #molecules                                                                                   | Half Sat for TNF induction of IL10 in activated Macs                                               |
| <i>Core.Mac/@thresholdNFkB</i>      | [75,115]      | #molecules                                                                                   | TNF threshold for NFkB activation                                                                  |
| <i>Core.Mac/@kNFkB</i>              | [0.7e-5,1e-5] | 1/seconds                                                                                    | Rate of NFkB activation                                                                            |
| <i>Core.Mac/@probKillExtMtbRest</i> | [0.05, 0.3]   | probability                                                                                  | Probability of a resting macrophage to kill some extracellular bacteria                            |
| <i>Core.Mac/@fKillExtMtbRest</i>    | [0.3, 0.5]    | fractional increase of a STAT1 or NFkB stimulated resting mac's probability to kill an extmt | Fractional increase of a resting macrophage to kill some extracellular bacteria when STAT1    NFkB |
| <i>Core.Mac/@nrExtMtbNFkB</i>       | [150, 250]    | #bacteria                                                                                    | Number of extracellular bacteria for NFkB activation in an infected macrophage                     |
| <i>Core.Mac/@nrIntMtbCInf</i>       | [8,12]        | #bacteria                                                                                    | Number of intracellular bacteria for an infected macrophage to become chronically infected         |
| <i>Core.Mac/@nrIntMtbBurstCInf</i>  | [13, 20]      | #bacteria                                                                                    | Number of intracellular bacteria for an chronically infected macrophage to burst                   |

---

|                                              |                |                                  |                                                                                        |
|----------------------------------------------|----------------|----------------------------------|----------------------------------------------------------------------------------------|
| <i>Core.Mac/@nrExtMtbUptakeAct</i>           | [3, 7]         | #bacteria                        | Number of extracellular bacteria an active macrophage can uptake and subsequently kill |
| <i>Core.Mac/@stat1ActivationTime</i>         | [400, 460]     | #agent time steps                | Time interval a Macrophage is STAT1 Activated                                          |
| <i>Core.Mac/@nfkbActivationTime</i>          | [13, 17]       | #agent time steps                | Time a Macrophage is NFkB Activated                                                    |
| <i>Core.Mac/@stat3ActivationTime</i>         | [75, 125]      | #agent time steps                | Time a Macrophage is STAT3 Activated                                                   |
| <i>Core.Mac/@thresholdSTAT3IL10</i>          | [5, 15]        | #molecules                       | Threshold of bound IL10 to IL10R1 for STAT3 signaling - Non-Molecular                  |
| <i>Core.Mac/@kSTAT3IL10</i>                  | [5e-4, 1.5e-3] | 1/(#molecules * agent time step) | Rate constant of bound IL10 to IL10R1 for STAT3 signaling - Non-Molecular              |
| <i>Core.Mac/@probHealCaseation</i>           | [0.005, 0.05]  | probability                      | Rate constant for wound healing - Non-Molecular                                        |
| <i>Core.Tcell/@maxAge</i>                    | [400, 460]     | #agent time steps                | Maximal T cell age                                                                     |
| <i>Core.Tcell/@exhaustedMaxAge</i>           | [400, 460]     | #agent time steps                | Maximal T cell age of an exhausted T cell                                              |
| <i>Core.Tcell/@probMoveToMac</i>             | [0.01, 0.2]    | probability                      | Probability of a T cell moving onto a compartment already containing a macrophage      |
| <i>Core.Tcell/@probMoveToTcell</i>           | [0.01, 0.2]    | probability                      | Probability of a T cell moving onto a compartment already containing another T cell    |
| <i>Core.Tcell/@maxDivisions</i>              | [3, 5]         | #Tcell divisions                 | Maximum number of divisions: max number of times a T cell can create a daughter cell   |
| <i>Core.Tcell.Tgam/@dTnf</i>                 | [0.1, 0.2]     | #molecules/second                | Secretion rate of TNF by Tgam                                                          |
| <i>Core.Tcell.Tgam/@maxTimeReg</i>           | [30, 40]       | #agent time steps                | Time span during which a Tgam cell remains down-regulated                              |
| <i>Core.Tcell.Tgam/@probApoptosisFasFasL</i> | [0.01, 0.03]   | Probability                      | Probability of Fas/FasL induced apoptosis by a Tgam cell                               |
| <i>Core.Tcell.Tgam/@probTNFProducer</i>      | [0.04, 0.1]    | Probability                      | Probability that this Tgam is producing TNF                                            |
| <i>Core.Tcell.Tgam/@probIFNProducer</i>      | [0.3, 0.4]     | Probability                      | Probability that this Tgam is producing TNF                                            |
| <i>Core.Tcell.Tgam/@probIFNMooreExtend</i>   | [0.20, 0.3]    | Probability                      | Probability Mac will be IFN/STAT1 activated in the extended Moore                      |
| <i>Core.Tcell.Tcyt/@dTnf</i>                 | [0.01, 0.02]   | #molecules/second                | Secretion rate of TNF by Tcyt                                                          |
| <i>Core.Tcell.Tcyt/@maxTimeReg</i>           | [30, 40]       | #agent time steps                | Time span during which a Tcyt cell remains down-regulated                              |
| <i>Core.Tcell.Tcyt/@probKillMac</i>          | [0.005, 0.015] | Probability                      | Probability of a Tcyt cell killing a (chronically) infected macrophage                 |
| <i>Core.Tcell.Tcyt/@probKillMacCleanly</i>   | [0.6, 0.9]     | Probability                      | Probability of a Tcyt cell killing a chronically infected macrophage cleanly           |

|                                                             |               |                   |                                                                             |
|-------------------------------------------------------------|---------------|-------------------|-----------------------------------------------------------------------------|
| <i>Core.Tcell.Tcyt/@probTNFProducer</i>                     | [0.05, 0.09]  | Probability       | Probability that this Tcyt is producing TNF                                 |
| <i>Core.Tcell.Treg/@dIL10</i>                               | [0.7, 0.8]    | #molecules/second | Secretion rate of IL10 by Treg                                              |
| <i>Core.Tcell.Treg/@probTregDeactivate</i>                  | [0.01, 0.02]  | probability       | Probability of successful downregulation by a Treg                          |
| <i>Core.Tcell.Treg/@factorDeactIL10</i>                     | [1,3]         | unitless          | Factor when a Treg is making IL-10 to scale<br>probTregDeactivate           |
| <i>Recruit.Prob/@timeMaxRecDelay</i>                        | [500,900]     | #agent time steps | Time after which maximum T cell recruitment is enabled                      |
| <i>Recruit.Prob.Mac/@maxRecProb</i>                         | [0.1, 0.4]    | probability       | Max probability of recruiting a macrophage - Scales<br>recruitment function |
| <i>Recruit.Prob.Mac/@thresholdRecChemokine</i>              | [0.015, 1.5]  | #molecules        | Threshold of Mac Recruitment for Chemokines                                 |
| <i>Recruit.Prob.Mac/@thresholdRecTNF</i>                    | [0.005, 0.5]  | #molecules        | Threshold of Mac Recruitment for TNF                                        |
| <i>Recruit.Prob.Mac/@recruitmentHalfSatTNF</i>              | [0.055, 5.5]  | #molecules        | Half-saturation paramter for Mac TNF-dependent<br>recruitment               |
| <i>Recruit.Prob.Mac/@recruitmentHalfSatChemokine</i>        | [1, 10]       | #molecules        | Half-saturation paramter for Mac chemokine-dependent<br>recruitment         |
| <i>Recruit.Prob.Tcell.Tgam/@maxRecProb</i>                  | [0.05, 0.15]  | probability       | Max probability of recruiting a Tgam - Scales recruitment<br>function       |
| <i>Recruit.Prob.Tcell.Tgam/@thresholdRecChemokine</i>       | [0.0151, 1.5] | #molecules        | Threshold of Tgam Recruitment for Chemokines                                |
| <i>Recruit.Prob.Tcell.Tgam/@thresholdRecTNF</i>             | [0.01, 1.0]   | #molecules        | Threshold of Tgam Recruitment for TNF                                       |
| <i>Recruit.Prob.Tcell.Tgam/@recruitmentHalfSatTNF</i>       | [0.04, 4.0]   | #molecules        | Half-saturation paramter for Tcell TNF-dependent<br>recruitment             |
| <i>Recruit.Prob.Tcell.Tgam/@recruitmentHalfSatChemokine</i> | [0.15, 15]    | #molecules        | Half-saturation paramter for Tcell chemokine-dependent<br>recruitment       |
| <i>Recruit.Prob.Tcell.Tcyt/@maxRecProb</i>                  | [0.03, 0.13]  | Probability       | Max probability of recruiting a Tcyt - Scales recruitment<br>function       |
| <i>Recruit.Prob.Tcell.Tcyt/@thresholdRecChemokine</i>       | [0.03775, 3]  | #molecules        | Threshold of TCYT Recruitment for Chemokines                                |
| <i>Recruit.Prob.Tcell.Tcyt/@thresholdRecTNF</i>             | [0.01, 1.0]   | #molecules        | Threshold of TCYT Recruitment for TNF                                       |
| <i>Recruit.Prob.Tcell.Tcyt/@recruitmentHalfSatTNF</i>       | [0.04, 4.0]   | #molecules        | Half-saturation paramter for Tcell TNF-dependent<br>recruitment             |
| <i>Recruit.Prob.Tcell.Tcyt/@recruitmentHalfSatChemokine</i> | [0.15, 15]    | #molecules        | Half-saturation paramter for Tcell chemokine-dependent<br>recruitment       |

|                                                             |                 |             |                                                                    |
|-------------------------------------------------------------|-----------------|-------------|--------------------------------------------------------------------|
| <i>Recruit.Prob.Tcell.Treg/@maxRecProb</i>                  | [0.0075, 0.075] | probability | Max probability of recruiting a Treg - Scales recruitment function |
| <i>Recruit.Prob.Tcell.Treg/@thresholdRecChemokine</i>       | [0.00755, 0.7]  | #molecules  | Threshold of TREG Recruitment for Chemokines                       |
| <i>Recruit.Prob.Tcell.Treg/@thresholdRecTNF</i>             | [0.01, 1.0]     | #molecules  | Threshold of TREG Recruitment for TNF                              |
| <i>Recruit.Prob.Tcell.Treg/@recruitmentHalfSatTNF</i>       | [0.04, 4.0]     | #molecules  | Half-saturation paramter for Tcell TNF-dependent recruitment       |
| <i>Recruit.Prob.Tcell.Treg/@recruitmentHalfSatChemokine</i> | [0.15, 15]      | #molecules  | Half-saturation paramter for Tcell chemokine-dependent recruitment |

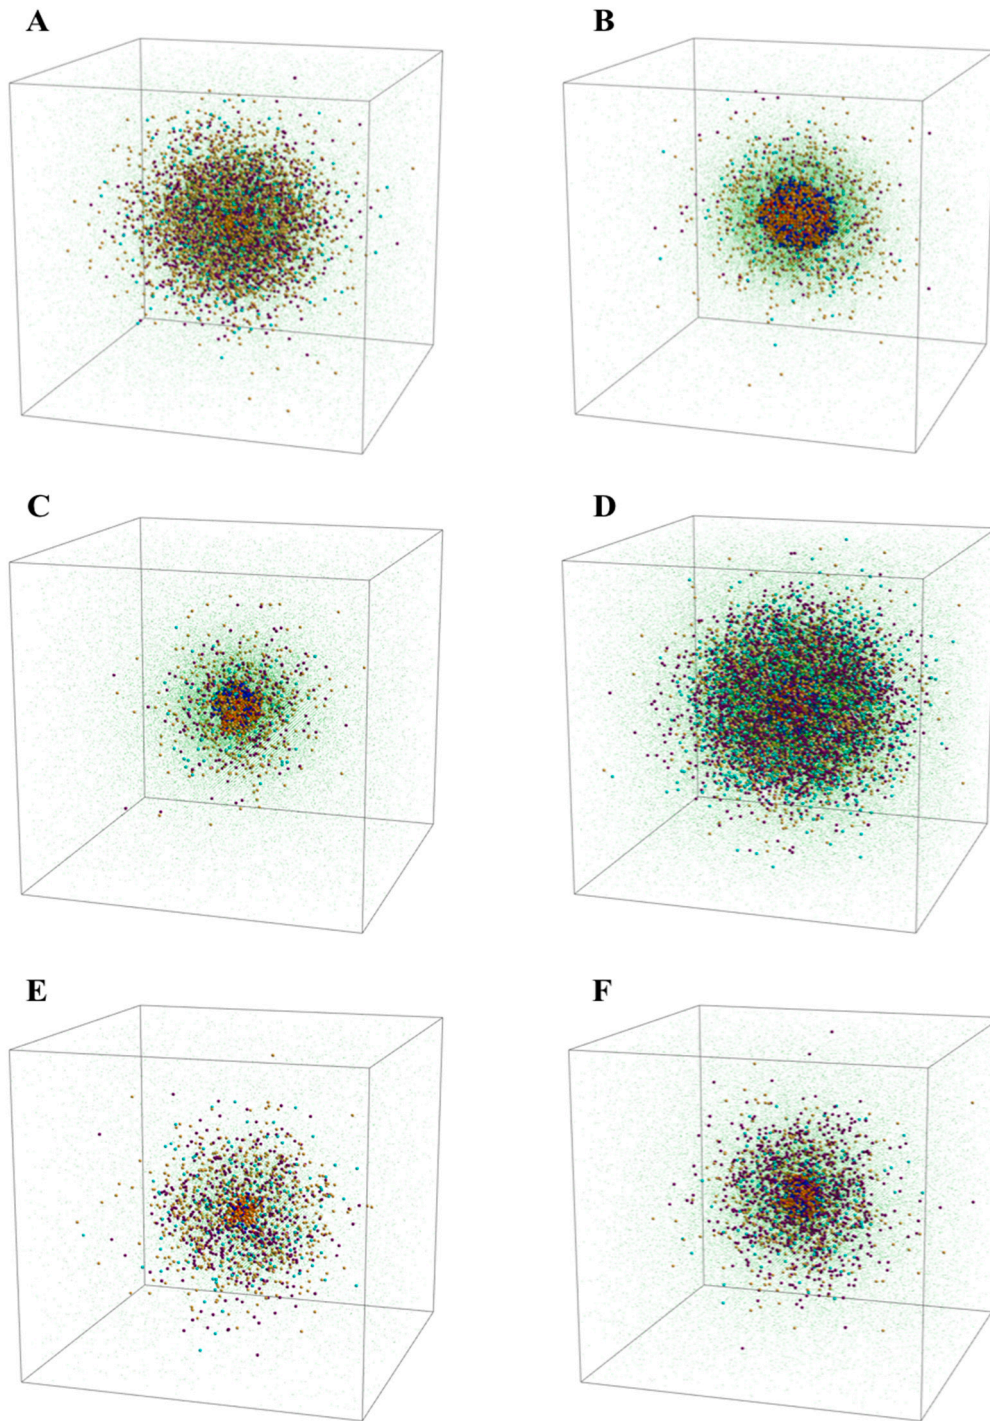

**Figure S1. Examples of other *in silico* granulomas, visualized in 3D.** Here we visualize *in silico* granulomas corresponding to eight of the 22 parameter files determined through the CFU calibration described in the Methods and Results section. These images illustrate some of the variation possible among the parameter files. Granulomas correspond to day 32 post infection. The list of the 90 parameters corresponding to each granuloma are shown in Table S2 in the Supplementary Material.

**Table S2.** list of the 90 parameters values corresponding to each granuloma shown in Figure S1. The experiment numbers shown refer to the correspondent parameter sample (out of 1,500 samples) generated by the Latin hypercube sampling scheme.

| <b>Parameter Name</b>                       | <b>Exp107</b> | <b>Exp1217</b> | <b>Exp1331</b> | <b>Exp588</b> | <b>Exp1099</b> | <b>Exp1460</b> |
|---------------------------------------------|---------------|----------------|----------------|---------------|----------------|----------------|
| <i>Mtb/@growthExtMtbBound</i>               | 212.7036      | 190.2303       | 226.7785       | 212.3112      | 216.5995       | 208.039        |
| <i>Mtb.Numbers/@growthRateIntMtb</i>        | 1.001955      | 1.00332        | 1.002095       | 1.00286       | 1.001791       | 1.001946       |
| <i>Mtb.Numbers/@growthRateExtMtb</i>        | 1.002698      | 1.001362       | 1.002077       | 1.002509      | 1.002293       | 1.002236       |
| <i>Mtb.Numbers/@deathRateExtMtbCaseated</i> | 1.73065       | 1.007751       | 1.839851       | 1.423186      | 1.949764       | 1.69439        |
| <i>Core/@estBoundFactorTNF</i>              | 0.431709      | 0.463145       | 0.463788       | 0.42911       | 0.414548       | 0.44913        |
| <i>Core/@estBoundFactorIL10</i>             | 0.484486      | 0.575668       | 0.510042       | 0.493809      | 0.438566       | 0.464123       |
| <i>Core/@estConsRateTNF</i>                 | 0.000844      | 0.000578       | 0.000868       | 0.000802      | 0.00073        | 0.000888       |
| <i>Core/@estConsRateIL10</i>                | 0.000509      | 0.000342       | 0.000254       | 0.0004        | 0.000465       | 0.000522       |
| <i>Core/@estIntPartitionTNF</i>             | 11.66407      | 12.57022       | 9.003913       | 10.61256      | 12.93329       | 9.716339       |
| <i>Core/@nrKillingsCaseation</i>            | 8             | 9              | 13             | 8             | 7              | 7              |
| <i>Core/@caseationHealingTime</i>           | 2250          | 2598           | 1834           | 2499          | 2295           | 2457           |
| <i>Core/@sourceDensity</i>                  | 0.031379      | 0.045881       | 0.047061       | 0.047537      | 0.006303       | 0.01274        |
| <i>Core/@diffusivityTNF</i>                 | 5.7E-08       | 4.11E-08       | 5.76E-08       | 4.28E-08      | 4.95E-08       | 4.7E-08        |
| <i>Core/@diffusivityChemokines</i>          | 4.04E-08      | 5.66E-08       | 5.39E-08       | 5.08E-08      | 4.7E-08        | 5.21E-08       |
| <i>Core/@diffusivityIL10</i>                | 4.09E-08      | 5.6E-08        | 4.82E-08       | 5.06E-08      | 4.78E-08       | 5.52E-08       |
| <i>Core/@ChemokineDeg</i>                   | 0.001173      | 0.003544       | 0.003088       | 0.001213      | 0.000677       | 0.001754       |
| <i>Core/@kDeg</i>                           | 0.004089      | 0.004835       | 0.003819       | 0.00222       | 0.004528       | 0.003773       |
| <i>Core/@Ikdeg</i>                          | 0.001559      | 0.002579       | 0.00089        | 0.002063      | 0.002785       | 0.000909       |
| <i>Core/@IC50ChemokineIL10</i>              | 5.986183      | 7.494756       | 4.081917       | 4.651744      | 9.853524       | 7.519626       |
| <i>Core/@thresholdApoptosisTNF</i>          | 3768.642      | 3834.609       | 3371.569       | 2061.799      | 4096.084       | 1422.949       |
| <i>Core/@kApoptosis</i>                     | 1.64E-06      | 1.73E-06       | 1.55E-06       | 2.86E-07      | 1.78E-06       | 2.02E-07       |
| <i>Core/@saturationApoptosisTNF</i>         | 8296.478      | 5055.741       | 8394.854       | 6674.25       | 6964.417       | 8877.03        |
| <i>Core/@minChemotaxis</i>                  | 26.10367      | 13.74456       | 33.17806       | 17.66427      | 12.74171       | 12.47196       |
| <i>Core/@maxChemotaxis</i>                  | 716.5819      | 714.0672       | 453.7457       | 659.3666      | 213.8385       | 728.2961       |
| <i>Core/@MaxIL10Inhibition</i>              | 0.156721      | 0.056617       | 0.28328        | 0.27405       | 0.210947       | 0.121587       |
| <i>Core.Mac/@initDensity</i>                | 0.013239      | 0.007467       | 0.014246       | 0.027988      | 0.009458       | 0.01706        |
| <i>Core.Mac/@movementRest</i>               | 3             | 6              | 4              | 3             | 9              | 3              |
| <i>Core.Mac/@movementAct</i>                | 49            | 42             | 38             | 27            | 11             | 33             |
| <i>Core.Mac/@movementInf</i>                | 123           | 113            | 123            | 144           | 175            | 153            |
| <i>Core.Mac/@dTnf</i>                       | 1.373567      | 1.52956        | 1.60419        | 1.695448      | 1.467669       | 1.558262       |
| <i>Core.Mac/@dCCL2</i>                      | 4.909274      | 5.895709       | 4.794036       | 6.306414      | 5.774316       | 5.632097       |
| <i>Core.Mac/@dCCL5</i>                      | 4.47138       | 4.943601       | 7.567779       | 7.016468      | 5.62262        | 6.173624       |



|                                              |          |          |          |          |          |          |
|----------------------------------------------|----------|----------|----------|----------|----------|----------|
| <i>Core.Mac/@dCXCL9</i>                      | 12.73673 | 10.04317 | 12.44619 | 10.43985 | 11.04102 | 13.88383 |
| <i>Core.Mac/@dIL10Act</i>                    | 0.344593 | 0.226707 | 0.387289 | 0.288056 | 0.369029 | 0.207422 |
| <i>Core.Mac/@dIL10Inf</i>                    | 0.023796 | 0.028697 | 0.019229 | 0.011304 | 0.027456 | 0.024041 |
| <i>Core.Mac/@halfSatIL10</i>                 | 208.5436 | 202.9831 | 208.1734 | 193.1971 | 205.0046 | 184.1318 |
| <i>Core.Mac/@thresholdNFkBTFN</i>            | 108.1988 | 76.39743 | 80.25483 | 83.68737 | 87.04637 | 84.98787 |
| <i>Core.Mac/@kNFkB</i>                       | 9.92E-06 | 9.85E-06 | 7.33E-06 | 8.96E-06 | 8.17E-06 | 7.89E-06 |
| <i>Core.Mac/@probKillExtMtbRest</i>          | 0.236164 | 0.243177 | 0.213914 | 0.125766 | 0.225209 | 0.156869 |
| <i>Core.Mac/@fKillExtMtbRest</i>             | 0.33891  | 0.318811 | 0.336385 | 0.436383 | 0.316346 | 0.485938 |
| <i>Core.Mac/@nrExtMtbNFkB</i>                | 203.5147 | 232.828  | 213.6564 | 187.7995 | 151.7827 | 242.0825 |
| <i>Core.Mac/@nrIntMtbCInf</i>                | 12       | 12       | 9        | 8        | 11       | 11       |
| <i>Core.Mac/@nrIntMtbBurstCInf</i>           | 18       | 19       | 13       | 20       | 19       | 14       |
| <i>Core.Mac/@nrExtMtbUptakeAct</i>           | 4        | 3        | 5        | 3        | 4        | 4        |
| <i>Core.Mac/@stat1ActivationTime</i>         | 438.74   | 455.9144 | 449.9    | 459.7025 | 438.8812 | 452.404  |
| <i>Core.Mac/@nfkbActivationTime</i>          | 14.16019 | 16.42173 | 13.23257 | 14.23056 | 16.21124 | 14.84746 |
| <i>Core.Mac/@stat3ActivationTime</i>         | 114.3614 | 88.32152 | 104.3877 | 124.7755 | 89.6549  | 105.7309 |
| <i>Core.Mac/@thresholdSTAT3IL10</i>          | 9.737525 | 13.11575 | 13.86993 | 6.789302 | 12.12305 | 11.70058 |
| <i>Core.Mac/@kSTAT3IL10</i>                  | 0.00139  | 0.001232 | 0.001019 | 0.000713 | 0.001193 | 0.000849 |
| <i>Core.Mac/@probHealCaseation</i>           | 0.014079 | 0.024336 | 0.049197 | 0.027745 | 0.028963 | 0.036337 |
| <i>Core.Tcell/@maxAge</i>                    | 411      | 434      | 424      | 432      | 411      | 402      |
| <i>Core.Tcell/@exhaustedMaxAge</i>           | 443      | 424      | 433      | 413      | 409      | 413      |
| <i>Core.Tcell/@probMoveToMac</i>             | 0.074868 | 0.042021 | 0.027888 | 0.077404 | 0.12059  | 0.088926 |
| <i>Core.Tcell/@probMoveToTcell</i>           | 0.025554 | 0.012214 | 0.032102 | 0.163135 | 0.083153 | 0.010266 |
| <i>Core.Tcell/@maxDivisions</i>              | 3        | 3        | 3        | 3        | 5        | 4        |
| <i>Core.Tcell.Tgam/@dTNF</i>                 | 0.197828 | 0.173356 | 0.127363 | 0.187541 | 0.157129 | 0.126285 |
| <i>Core.Tcell.Tgam/@maxTimeReg</i>           | 40       | 37       | 37       | 39       | 39       | 35       |
| <i>Core.Tcell.Tgam/@probApoptosisFasFasL</i> | 0.01646  | 0.018783 | 0.02629  | 0.012317 | 0.018548 | 0.018535 |
| <i>Core.Tcell.Tgam/@probTNFProducer</i>      | 0.083465 | 0.050492 | 0.093335 | 0.056354 | 0.057832 | 0.045978 |
| <i>Core.Tcell.Tgam/@probIFNProducer</i>      | 0.37901  | 0.338223 | 0.319791 | 0.371618 | 0.38481  | 0.301018 |
| <i>Core.Tcell.Tgam/@probIFNMooreExtend</i>   | 0.228199 | 0.243467 | 0.206911 | 0.279134 | 0.268253 | 0.26071  |
| <i>Core.Tcell.Tcyt/@dTNF</i>                 | 0.014435 | 0.019764 | 0.01376  | 0.016656 | 0.016756 | 0.019005 |
| <i>Core.Tcell.Tcyt/@maxTimeReg</i>           | 39       | 38       | 39       | 32       | 34       | 37       |
| <i>Core.Tcell.Tcyt/@probKillMac</i>          | 0.013302 | 0.012353 | 0.007546 | 0.008492 | 0.01136  | 0.012423 |
| <i>Core.Tcell.Tcyt/@probKillMacCleanly</i>   | 0.886567 | 0.623039 | 0.890478 | 0.755467 | 0.635762 | 0.640955 |
| <i>Core.Tcell.Tcyt/@probTNFProducer</i>      | 0.086863 | 0.066919 | 0.084475 | 0.069241 | 0.066652 | 0.070682 |
| <i>Core.Tcell.Treg/@dIL10</i>                | 0.773153 | 0.798214 | 0.705819 | 0.737648 | 0.746762 | 0.756761 |
| <i>Core.Tcell.Treg/@probTregDeactivate</i>   | 0.014375 | 0.011237 | 0.016095 | 0.014172 | 0.01214  | 0.017359 |

|                                                             |          |          |          |          |          |          |
|-------------------------------------------------------------|----------|----------|----------|----------|----------|----------|
| <i>Core.Tcell.Treg/@factorDeactIL10</i>                     | 2.899996 | 2.6052   | 1.660427 | 1.292824 | 1.398151 | 2.641041 |
| <i>Recruit.Prob/@timeMaxRecDelay</i>                        | 740      | 554      | 851      | 617      | 645      | 562      |
| <i>Recruit.Prob.Mac/@maxRecProb</i>                         | 0.311086 | 0.357383 | 0.277989 | 0.287472 | 0.140233 | 0.365722 |
| <i>Recruit.Prob.Mac/@thresholdRecChemokine</i>              | 0.844973 | 1.299753 | 0.288299 | 1.063154 | 0.567517 | 0.409053 |
| <i>Recruit.Prob.Mac/@thresholdRecTNF</i>                    | 0.32985  | 0.328308 | 0.346965 | 0.196217 | 0.01885  | 0.476191 |
| <i>Recruit.Prob.Mac/@recruitmentHalfSatTNF</i>              | 2.013039 | 2.80207  | 2.313902 | 1.689667 | 4.445079 | 4.003354 |
| <i>Recruit.Prob.Mac/@recruitmentHalfSatChemokine</i>        | 9.336256 | 3.056593 | 6.790684 | 9.098188 | 6.538349 | 5.050239 |
| <i>Recruit.Prob.Tcell.Tgam/@maxRecProb</i>                  | 0.113713 | 0.054449 | 0.115355 | 0.0585   | 0.070061 | 0.079866 |
| <i>Recruit.Prob.Tcell.Tgam/@thresholdRecChemokine</i>       | 0.104409 | 0.179187 | 1.100593 | 0.492282 | 0.710556 | 0.513107 |
| <i>Recruit.Prob.Tcell.Tgam/@thresholdRecTNF</i>             | 0.833406 | 0.856212 | 0.9306   | 0.234757 | 0.9124   | 0.288354 |
| <i>Recruit.Prob.Tcell.Tgam/@recruitmentHalfSatTNF</i>       | 0.040101 | 3.369557 | 3.622599 | 1.723027 | 0.953238 | 1.924597 |
| <i>Recruit.Prob.Tcell.Tgam/@recruitmentHalfSatChemokine</i> | 8.499244 | 11.20854 | 13.40532 | 10.91517 | 7.0765   | 9.254699 |
| <i>Recruit.Prob.Tcell.Tcyt/@maxRecProb</i>                  | 0.116013 | 0.040857 | 0.06603  | 0.099326 | 0.098067 | 0.088366 |
| <i>Recruit.Prob.Tcell.Tcyt/@thresholdRecChemokine</i>       | 1.995664 | 1.663344 | 1.241825 | 1.831602 | 1.829797 | 1.621107 |
| <i>Recruit.Prob.Tcell.Tcyt/@thresholdRecTNF</i>             | 0.742341 | 0.759802 | 0.294099 | 0.186856 | 0.209493 | 0.281977 |
| <i>Recruit.Prob.Tcell.Tcyt/@recruitmentHalfSatTNF</i>       | 1.182729 | 1.921854 | 2.932541 | 3.602318 | 3.510149 | 1.085081 |
| <i>Recruit.Prob.Tcell.Tcyt/@recruitmentHalfSatChemokine</i> | 4.760701 | 12.63024 | 8.863514 | 4.184256 | 13.54121 | 1.145628 |
| <i>Recruit.Prob.Tcell.Treg/@maxRecProb</i>                  | 0.061887 | 0.032558 | 0.040755 | 0.044468 | 0.030325 | 0.050833 |
| <i>Recruit.Prob.Tcell.Treg/@thresholdRecChemokine</i>       | 0.375637 | 0.407376 | 0.489457 | 0.500638 | 0.101731 | 0.539927 |
| <i>Recruit.Prob.Tcell.Treg/@thresholdRecTNF</i>             | 0.054114 | 0.102815 | 0.939653 | 0.813379 | 0.04119  | 0.931099 |
| <i>Recruit.Prob.Tcell.Treg/@recruitmentHalfSatTNF</i>       | 3.205315 | 3.839902 | 3.859628 | 3.317244 | 1.653953 | 1.676516 |
| <i>Recruit.Prob.Tcell.Treg/@recruitmentHalfSatChemokine</i> | 14.48033 | 13.57721 | 10.82076 | 2.082219 | 6.314493 | 4.472219 |
